# Supplementary material for: Stable slippery liquid-infused anti-wetting surface at high temperatures
Source: Royal Society of Chemistry journal article supplement (doi:10.1039/c6ta03857c), 2016-01-01
Supplement: c6ta03857c1.pdf [file c6ta03857c1.pdf]

## Supplementary Information

### Stable slippery liquid-infused anti-wetting surface at high temperatures

Pengfei Zhang,<sup>a</sup> Huawei Chen,<sup>\*a</sup> Liwen Zhang,<sup>a</sup> Yi Zhang,<sup>a</sup> Deyuan Zhang<sup>\*a</sup> and Lei Jiang<sup>b</sup>

a. School of Mechanical Engineering and Automation, Beihang University, Beijing 100191, China. E-mail: chenhw75@buaa.edu.cn; zhangdy@buaa.edu.cn.

b. Laboratory of Bio-inspired Smart Interface Science, Technical Institute of Physics and Chemistry, Chinese Academy of Sciences, Beijing 100190, China.

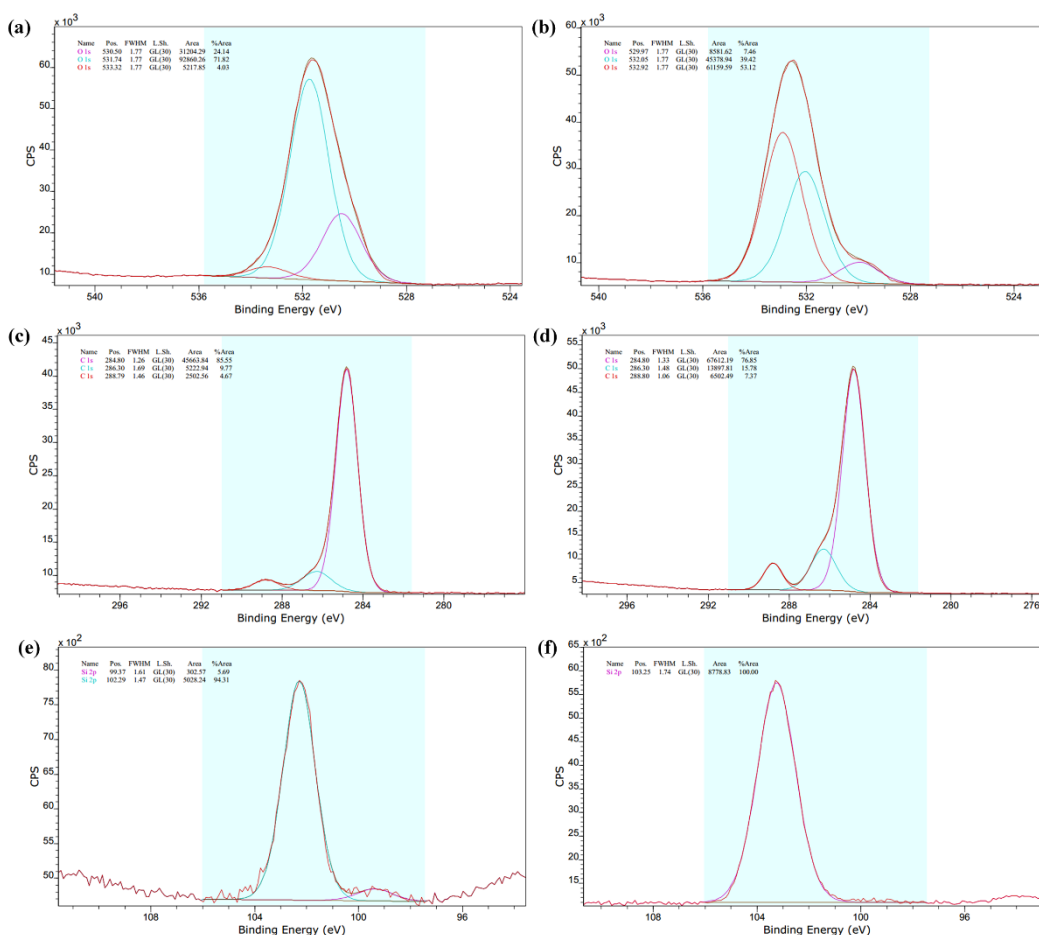

**Figure S1.** XPS spectra (C1s) of chemical etched stainless steel (a, c and e) and OTS coated chemical etched stainless steel (b, d and f). (a) and (b) are the spectra of carbon, (c) and (d) are the spectra of oxygen, and (e) and (f) are the spectra of silicon.

**Table S1.** Physical properties of the silicone oils by manufactures.

| Viscosity/(cst, 25 °C) | Density/(g ml <sup>-1</sup> , 25 °C) | Surface Tension/(mN m <sup>-1</sup> ,<br>25 °C) |
|------------------------|--------------------------------------|-------------------------------------------------|
| 50                     | 0.960                                | 20.8                                            |
| 100                    | 0.965                                | 20.9                                            |
| 350                    | 0.970                                | 21.1                                            |

**Table S2.** Surface concentrations of carbon, oxygen and silicon in chemical etched stainless (CESS) and OTS coated CESS, as determined by XPS analysis.

| Surface         | C     | O     | Si   |
|-----------------|-------|-------|------|
| CESS            | 42.96 | 33.54 | 4.39 |
| OTS coated CESS | 62.15 | 26.39 | 6.29 |
